# Supplementary material for: Hunger, Food Cravings, and Diet Satisfaction are Related to Changes in Body Weight During a 6-Month Behavioral Weight Loss Intervention: The Beef WISE Study
Source: PubMed Central journal article supplement (PMC6024699; doi:10.3390/nu10060700), 2018-05-31
Supplement: nutrients-10-00700-s001.pdf [file nutrients-10-00700-s001.pdf]

**Supplemental Table 1:** Reported Appetite and Craving Visual Analog Scale Scores during Weight Loss<sup>1</sup>.

| Parameter       | Group                   | Baseline   | Week 8      | Week 16     | Week 24     |
|-----------------|-------------------------|------------|-------------|-------------|-------------|
| <b>Hunger</b>   | Beef                    | 51.1 ± 2.3 | 39.9 ± 2.5* | 40.2 ± 2.7* | 40.3 ± 2.8* |
|                 | Non-Beef                | 47.8 ± 2.4 | 40.7 ± 2.6* | 43.0 ± 2.6  | 41.0 ± 2.8* |
|                 | Difference <sup>2</sup> | 3.4 ± 3.3  | -0.8 ± 3.6  | -2.9 ± 3.7  | -0.7 ± 4.0  |
| <b>Fullness</b> | Beef                    | 51.8 ± 2.2 | 53.9 ± 2.4  | 51.2 ± 2.5  | 53.7 ± 2.6  |
|                 | Non-Beef                | 52.9 ± 2.2 | 55.3 ± 2.4  | 50.6 ± 2.5  | 53.6 ± 2.8  |
|                 | Difference              | -1.0 ± 3.1 | -1.4 ± 3.4  | 0.6 ± 3.5   | 0.03 ± 3.7  |
| <b>Cravings</b> | Beef                    | 53.4 ± 2.5 | 42.5 ± 2.7* | 38.6 ± 2.9* | 40.0 ± 3.0* |
|                 | Non-Beef                | 49.7 ± 2.6 | 43.1 ± 2.8* | 45.3 ± 2.8  | 44.3 ± 3.0  |
|                 | Difference              | 3.7 ± 3.6  | -0.7 ± 3.9  | -6.8 ± 4.0  | -4.3 ± 4.3  |

<sup>1</sup> Values are LSMEANS ± SE from the linear mixed effects model.

<sup>2</sup> Between group differences calculated as Beef – Non-Beef. Differences may not exactly reflect values for Beef and Non-Beef due to rounding.

A linear mixed effects model (SAS, Proc Mixed) was used to compare hunger, fullness, and craving ratings at baseline, week 8, week 16, and week 24 between Beef and Non-Beef groups. \* indicates a within-group difference in rating at time point vs. baseline ( $p < 0.05$ ).

**Supplemental Table 2:** Self-Reported Compliance, Satisfaction, and Deprivation with the Diet Plan<sup>1</sup>.

| Parameter           | Group                   | Week 16       | Week 24      |
|---------------------|-------------------------|---------------|--------------|
| <b>Compliance</b>   | Beef                    | 3.8 ± 0.85    | 3.5 ± 1.0    |
|                     | Non-Beef                | 4.0 ± 0.68    | 3.6 ± 0.95   |
|                     | Difference <sup>2</sup> | -0.16 ± 0.78  | -0.11 ± 1.0  |
| <b>Satisfaction</b> | Beef                    | 3.8 ± 1.0     | 3.7 ± 1.0    |
|                     | Non-Beef                | 3.8 ± 0.89    | 3.6 ± 1.1    |
|                     | Difference              | -0.09 ± 0.95  | 0.11 ± 1.1   |
| <b>Deprivation</b>  | Beef                    | 1.9 ± 0.82    | 2.0 ± 0.81   |
|                     | Non-Beef                | 2.4 ± 1.0     | 2.4 ± 1.6    |
|                     | Difference              | -0.48 ± 0.94* | -0.44 ± 1.0* |

<sup>1</sup> Values are Mean ± SD.

<sup>2</sup> Between group differences calculated as Beef – Non-Beef. Differences may not exactly reflect values for Beef and Non-Beef due to rounding.

A linear mixed effects model (SAS, Proc Mixed) was used to compare compliance, satisfaction, and deprivation ratings at week 16 and week 24 between Beef and Non-Beef groups. Ratings were completed using a Likert Scale with ratings from 1 (Not at All) to 5 (Extremely). \* indicates a significant ( $p < 0.05$ ) between-group difference.
